# Supplementary material for: Non-planar vertical photodetectors based on free standing two-dimensional SnS2 nanosheets
Source: Royal Society of Chemistry journal article supplement (doi:10.1039/c7nr03646a), 2017-01-01
Supplement: c7nr03646a1.pdf [file c7nr03646a1.pdf]

1 **Supporting Information**

2 **Non-Planar Vertical Photodetectors Based on Free-Standing Two-Dimensional**

3 **SnS<sub>2</sub> Nanosheets**

4

5 Guangbo Liu,<sup>a,c</sup> Zhonghua Li,<sup>a</sup> Xiaoshuang Chen,<sup>a</sup> Wei Zheng,<sup>a</sup> Wei Feng,<sup>a</sup> Mingjin

6 Dai,<sup>a</sup> Dechang Jia,<sup>b</sup> Yu Zhou<sup>b</sup> and PingAn Hu<sup>a\*</sup>

7 <sup>a</sup>Key Laboratory of Micro-systems and Micro-structures Manufacturing of Ministry of  
8 Education, Harbin Institute of Technology, Harbin 150080, P. R. China.

9 <sup>b</sup>Institute for Advanced Ceramics, Harbin Institute of Technology, Harbin 150001, P.  
10 R. China.

11 <sup>c</sup>Department of Chemistry, Harbin Institute of Technology, Harbin, 150001, P. R.  
12 China.

13 **Corresponding Author**

14 \*hupa@hit.edu.cn (P.A.H.)

15

16 **Experimental Section**

17 *Synthesis of Free-standing 2D SnS<sub>2</sub> Nanosheets.* Free-standing 2D SnS<sub>2</sub> nanosheets  
18 were vertically grown onto FTO substrate by CVD method in a two-temperature zone  
19 tube furnace. In a typical growth procedure, 100 mg SnCl<sub>4</sub>·5H<sub>2</sub>O powder was loaded  
20 in an alumina boat, was placed at the center of the downstream heating zone. A FTO  
21 substrate was placed downstream to the SnCl<sub>4</sub>·5H<sub>2</sub>O powder. The distance of the  
22 SnCl<sub>4</sub>·5H<sub>2</sub>O alumina boat and the substrate is ~3 cm. 200 mg S powder was placed in  
23 another alumina boat at the upstream heating zone. Before the start of the growth, the  
24 furnace chamber was flushed with 1200 sccm high purity Ar gas for ~20 min to  
25 remove oxygen in the chamber. Next, the center of the downstream heating zone was  
26 heated to 450°C from room temperature at a ramp rate of 10°C. At the same time, the  
27 temperature of the S powder at the upstream heating zone was set to 250°C. The

1 temperature in the downstream heating zone was kept at 450°C for 5 min for the SnS<sub>2</sub>  
2 growth under a mixture carrier gas of H<sub>2</sub> (15 sccm) and Ar (45 sccm). After the  
3 growth, the furnace was naturally cooled down to room temperature and free-standing  
4 vertical 2D SnS<sub>2</sub> nanosheets on FTO substrate were obtained.

5 *Device Fabrication.* To fabricate the vertically structured optoelectronic device, free-  
6 standing vertical SnS<sub>2</sub> nanosheets were firstly prepared on conductive FTO substrate.  
7 Then, a PMMA layer was spin-coated onto the substrate to wrap the SnS<sub>2</sub> nanosheets.  
8 After that, the top part of the PMMA was etched away by using oxygen plasma,  
9 exposing fresh and clean tips of the nanosheets. Then, Au film with a thickness of 20  
10 nm was deposited on the top of the exposed nanosheets by thermal evaporation. For  
11 fabricating the parallel SnS<sub>2</sub> nanosheet photodetector, the as-grown vertical SnS<sub>2</sub>  
12 nanosheets were firstly transferred from FTO to SiO<sub>2</sub>/Si substrates. Au electrodes  
13 with thickness of 30 nm were then deposited via thermal evaporation using a copper  
14 grid shadow mask. The device was annealed at 200 °C to reduce resistance before  
15 measurements.

16 *Materials and Device Characterizations.* The crystallographic characterization of the  
17 samples was performed using a Philips Panalytical X'Pert Pro multipurpose  
18 diffractometer with Cu-K $\alpha$  X-ray radiation ( $\lambda=1.5418$  Å). The morphologies of the  
19 samples were examined using a Hitachi SU8000 field-emission scanning electron  
20 microscope (FE-SEM) with a 20 kV accelerating voltage. Atomic force microscopy  
21 (AFM) characterizations were performed using a Bruker Dimension Icon AFM. The  
22 detailed microstructure, growth orientations and composition of the SnS<sub>2</sub> nanosheets  
23 were carried out by a Tecnai-G2 F30 transmission electron microscopy (TEM)  
24 attached with an energy dispersive X-ray spectroscopy (EDS) system, operating at

1 300 kV. The temperature gradient in the furnace was detected by using a TES-1310  
2 digital thermometer equipped with a WRNK-81530 thermocouple (TES Electrical  
3 Electronic Corp., Taipei). Raman and photoluminescence (PL) spectra for the  
4 vertically oriented 2D SnS<sub>2</sub> nanosheets were collected from a LabRAM XploRA laser  
5 Raman spectrometer (HORIBA Jobin Yvon CO. Ltd) with excitation wavelength of  
6 442 nm and 532 nm, intensity of 82 μW and 150 μW, respectively. Oxygen plasma  
7 treatment was performed on a PDC-32G-2 Plasma Cleaner (Harrick Plasma). The  
8 device was characterized using a semiconductor analyzer (Keithley 4200 SCS)  
9 combined with a Lakeshore probe station. Photoelectric data are obtained by using a  
10 500 W xenon lamp as the light source. Mono-chromatic lights of 254-850 nm are  
11 obtained using optical filters. The intensities of incident light source are measured by  
12 a power and energy meter (Model 372, Scientek).

13

14

1 **Supplementary Figures**

2

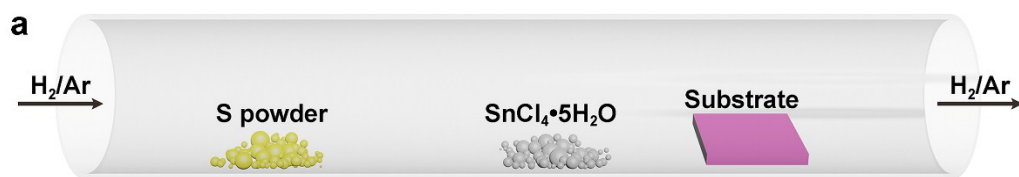

3

4 **Figure S1.** Schematic for CVD synthesis setup of vertical  $SnS_2$  nanosheets.

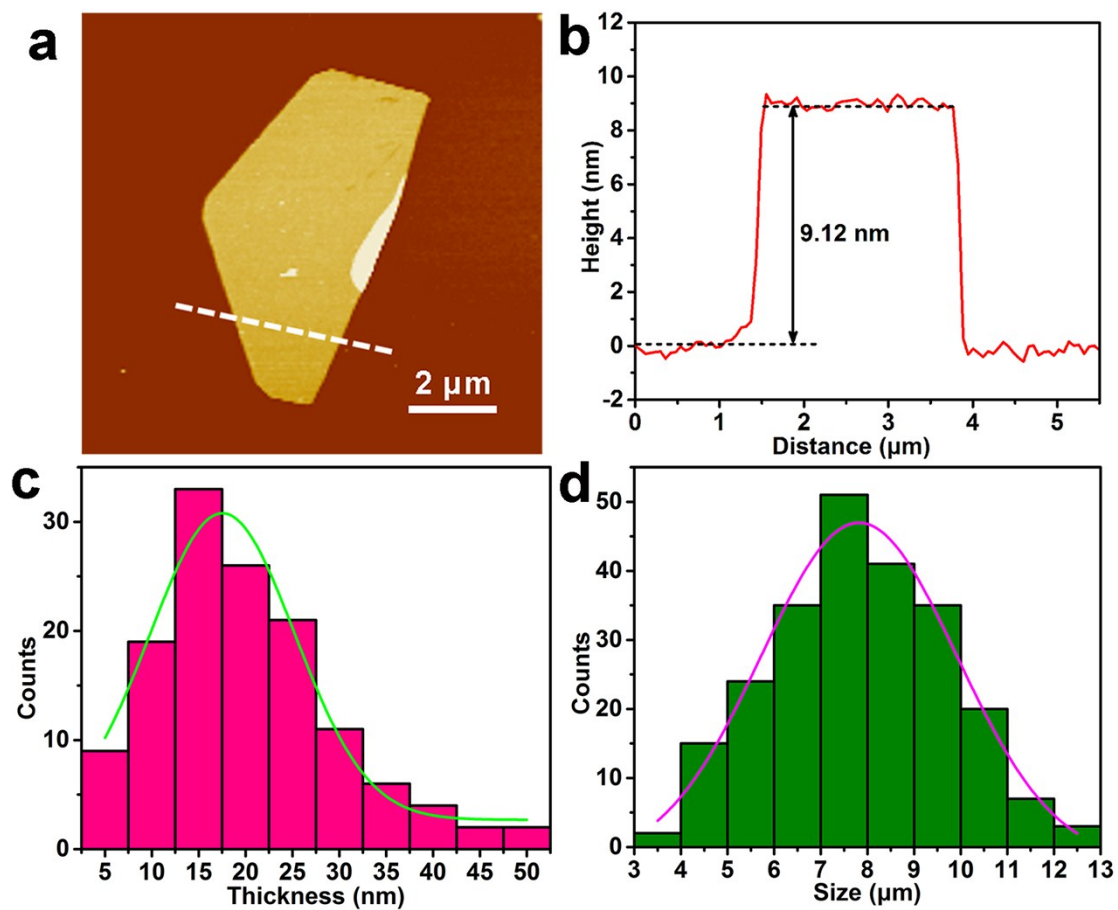

1  
2 **Figure S2.** Statistical distribution of thickness and size of the as-grown vertical SnS<sub>2</sub>  
3 nanosheets: (a) Typical AFM image and (b) height profile of a 2D SnS<sub>2</sub> nanosheet. (c)  
4 Statistical distribution of the SnS<sub>2</sub> crystal thickness, smooth curve is the Gaussian fit  
5 of the thickness distribution. (d) Statistical distribution of the SnS<sub>2</sub> crystal domain size,  
6 smooth curve is the Gaussian fit of the size distribution.

7

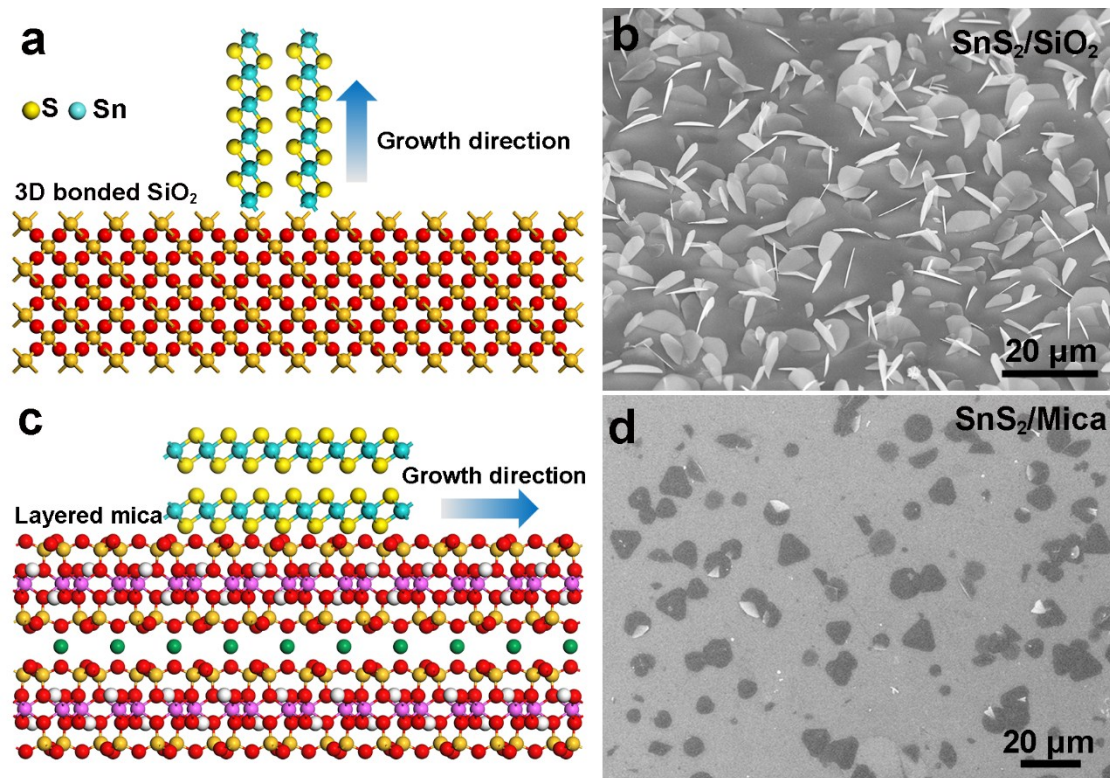

1

2 **Figure S3.** Schematic illustrations of SnS<sub>2</sub> grown on (a) SiO<sub>2</sub> and (c) mica substrates.

3 SEM image of as-grown SnS<sub>2</sub> nanosheets on (b) SiO<sub>2</sub> and (d) mica substrates.

4

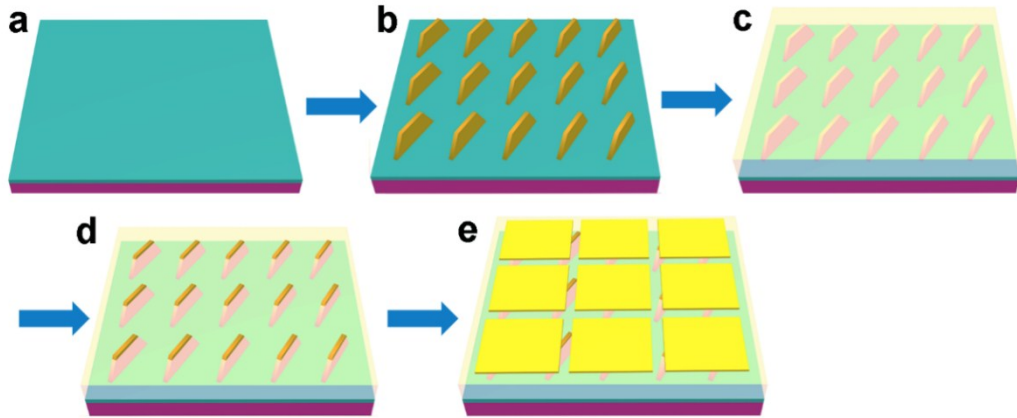

1

2 **Figure S4.** Steps for fabrication of vertical SnS<sub>2</sub> nanosheets optoelectronic device. (a)

3 Bare FTO substrate, (b) vertical SnS<sub>2</sub> nanosheets grown by CVD, (c) spin-coating

4 polymethyl-methacrylate (PMMA) that covers both the bottom and top of the

5 nanosheets, (d) after oxygen plasma etching, the tips of the nanosheets are exposed, (e)

6 deposition of Au electrode with thickness of 20 nm on the top of the nanosheets.

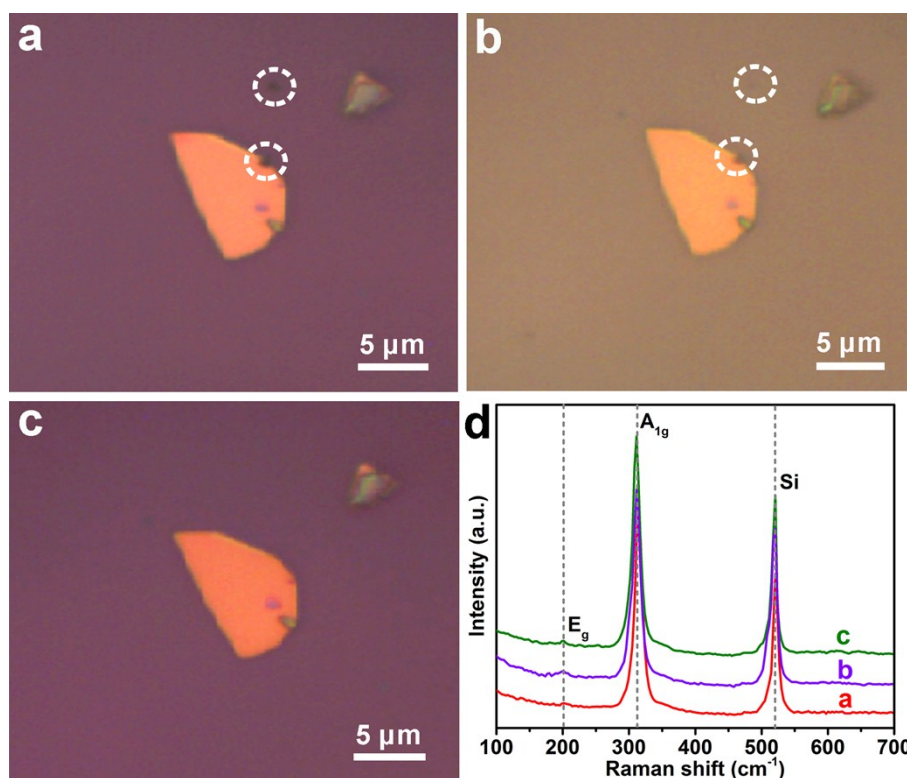

1

2 **Figure S5.** Oxygen plasma etching of SnS<sub>2</sub> nanosheet. (a) Primitive SnS<sub>2</sub> nanosheet, (b)  
 3 after spin coating PMMA, (c) after O<sub>2</sub> plasma treatment for 30 min, (d) Raman  
 4 characterizations.

5 According to a previous report,<sup>1</sup> the oxygen plasma has no affect on the SnS<sub>2</sub>  
 6 nanosheets. To further confirm this, we performed a supplementary study on the oxygen  
 7 plasma etching of our grown 2D SnS<sub>2</sub> nanosheets. As shown in Figure S5, we firstly  
 8 transfered a SnS<sub>2</sub> nanosheet onto SiO<sub>2</sub>/Si substrates (Figure S5a, the white circles  
 9 denote organic residues on substrates). Then a PMMA layer was spincoated onto the  
 10 substrate to wrap the SnS<sub>2</sub> nanosheet (Figure S5b). As seen that after spin coating the  
 11 colors of the substrate is changed, indicating the successful coverage of PMMA layer.  
 12 After oxygen plasma treatment for 30 min, as seen in Figure S5c, the substrate color  
 13 restored, implying the PMMA layer was completely removed. In addition, the  
 14 residues on substrates were also removed, however, the SnS<sub>2</sub> nanosheet did not show



1 any change. The above results prove that oxygen plasma etching has no effect on the  
2 SnS<sub>2</sub> nanosheets, but may be used to selectively remove organic residues on the  
3 substrates, which is consistent with the findings reported by P. Sutter and coauthors.<sup>1</sup>  
4 Meanwhile, the SnS<sub>2</sub> nanosheet also showed no change in Raman peaks before and  
5 after oxygen plasma treatment (Figure S5d), further confirming there was no SnS<sub>2</sub>  
6 etching occurred.

7

8

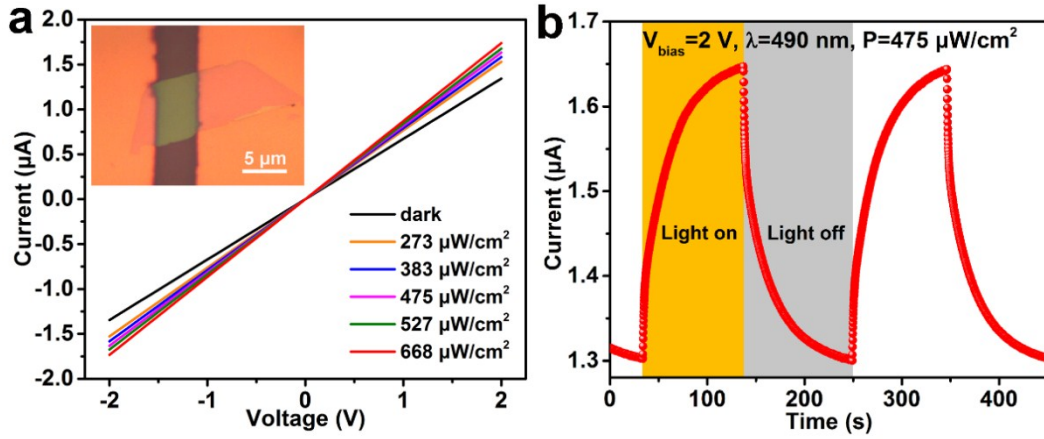

1

2 **Figure S6.** Optoelectronic properties of the parallel SnS<sub>2</sub> nanosheet photodetector

3 with Au electrodes only. (a) *I-V* characteristics of the device in the dark and under

4 light illumination with various power intensities. (b) *I-t* curve of the device at  $V_{\text{bias}} = 2$

5 V,  $\lambda = 490$  nm, and  $P_{\text{light}} = 475$  μW/cm<sup>2</sup>.

6

1

2 **Table S1** Performance comparison of SnS<sub>2</sub> and other 2D-LMDs based photodetectors.

| Device                    | Bias<br>(V) | Responsivity<br>(A/W) | EQE (%)             | Detectivity<br>(Jones) | Rise time<br>(ms)  | Decay time<br>(ms) | References |
|---------------------------|-------------|-----------------------|---------------------|------------------------|--------------------|--------------------|------------|
| FL SnS <sub>2</sub>       | -           | 100                   | -                   | -                      | 44                 | 44                 | 1          |
| FL SnS <sub>2</sub>       | 2           | 8×10 <sup>-3</sup>    | 2.4                 | 2×10 <sup>9</sup>      | 5×10 <sup>-3</sup> | 7×10 <sup>-3</sup> | 2          |
| FL SnS <sub>2</sub>       | 10          | 2                     | -                   | -                      | 42                 | 42                 | 3          |
| FL SnS <sub>2</sub>       | 3           | 100                   | -                   | -                      | 330                | 130                | 4          |
| FL SnS <sub>2</sub>       | 1           | 0.31                  | 71                  | -                      | 42                 | 40                 | 5          |
| FL SnS <sub>2</sub>       | 1           | 261                   | 9.3×10 <sup>4</sup> | 1.9×10 <sup>10</sup>   | 20                 | 16                 | 6          |
| FL SnS <sub>2</sub>       | 5           | 0.65                  | 0.15                | 1.13×10 <sup>8</sup>   | 360                | 360                | 7          |
| SnS <sub>2</sub> film     | 5           | 6.12×10 <sup>-6</sup> | -                   | -                      | 460                | 880                | 8          |
| SnS <sub>2</sub> flake    | 1           | 1.19                  | -                   | 2.35×10 <sup>11</sup>  | 1                  | 1                  | 9          |
| FL SnSe <sub>2</sub>      | 3           | 1.1×10 <sup>3</sup>   | 2.6×10 <sup>5</sup> | 1.01×10 <sup>10</sup>  | 14.5               | 8.1                | 10         |
| 1L MoS <sub>2</sub>       | 1           | 7.5×10 <sup>-3</sup>  | -                   | -                      | 50                 | 50                 | 11         |
| Vertical SnS <sub>2</sub> | 2           | 1.85                  | 469                 | 4.91×10 <sup>9</sup>   | 43.4               | 64.4               | This work  |

3

4 **References**

5 [1] Y. Huang, E. Sutter, J.T. Sadowski, M. Cotlet, O.L.A. Monti, D.A. Racke, M.R.

6 Neupane, D. Wickramaratne, R.K. Lake, B.A. Parkinson, P. Sutter, *ACS Nano*7 **2014**, *8*, 10743.

8 [2] G. Su, V.G. Hadjiev, P.E. Loya, J. Zhang, S. Lei, S. Maharjan, P. Dong, P. M.

9 Ajayan, J. Lou, H. Peng, *Nano Lett.* **2015**, *15*, 506.10 [3] J. Xia, D. Zhu, L. Wang, B. Huang, X. Huang, X.-M. Meng, *Adv. Funct. Mater.*11 **2015**, *25*, 4255.

12 [4] Y. Huang, H.X. Deng, K. Xu, Z.X. Wang, Q.S. Wang, F.M. Wang, F. Wang, X.Y.

- 1 Zhan, S.S. Li, J.W. Luo, J. He, *Nanoscale* **2015**, 7, 14093.
- 2 [5] C. Fan, Y. Li, F. Lu, H.-X. Deng, Z. Wei, J. Li, *RSC Adv.* **2016**, 6, 422.
- 3 [6] X. Zhou, Q. Zhang, L. Gan, H. Li, T. Zhai, *Adv. Funct. Mater.* **2016**, 26, 4405.
- 4 [7] J.-J. Wu, Y.-R. Tao, Y. Wu, X.-C. Wu, *Sensor Actuat. B-chem* **2016**, 231, 211.
- 5 [8] D. Yang, B. Li, C. Hu, H. Deng, D. Dong, X. Yang, K. Qiao, S. Yuan, H. Song,  
6 *Adv. Opt. Mater.* 2016, 4, 419.
- 7 [9] Y. Tao, X. Wu, W. Wang, J. Wang, *J. Mater. Chem. C* 2015, 3, 1347.
- 8 [10] X. Zhou, L. Gan, W. Tian, Q. Zhang, S. Jin, H. Li, Y. Bando, D. Golberg, T.  
9 Zhai, *Adv. Mater.* **2015**, 27, 8035.
- 10 [11] Z. Yin, H. Li, H. Li, L. Jiang, Y. Shi, Y. Sun, G. Lu, Q. Zhang, X. Chen, H.  
11 Zhang, *ACS Nano* **2012**, 6, 74.
- 12
- 13
